# Supplementary material
Source: publisher figshare collection journal article supplement (https://acs.figshare.com/ndownloader/files/11026709)
Supplement: Supplementary file 1 [file 11026709]

## Supporting Information

### Capillary Imbibition of Polymer Mixtures in Nanopores

Yang Yao, Hans-Juergen Butt, Jiajia Zhou, Masao Doi, George Floudas

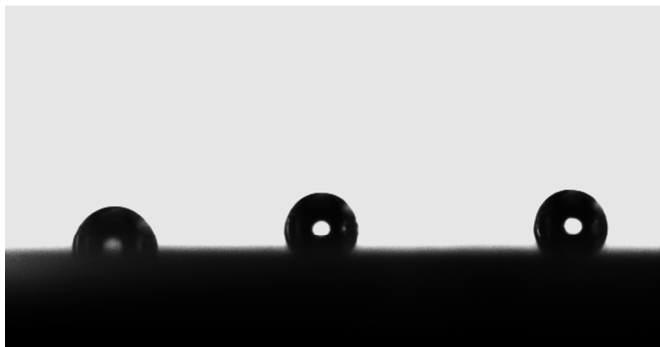

**Figure S1 and Video** of spreading of three droplets corresponding to the homopolymers (PEO 50k: left, PEO 500k: right) and their symmetric mixture (middle) on a flat alumina surface at 85 °C

## Dynamic contact angle

The effect of employing the dynamic contact angle (DCA),  $\theta_d$ , instead of the equilibrium one (ECA),  $\theta_e$ , was examined. It is known that DCA depends on the velocity of the three-phase contact line,  $v$ , results in a modification to the LWE. The exact form of the  $\theta(v)$  dependence is still a point of debate,<sup>1-3</sup> however, the thermodynamic theory proposed by Cox<sup>4</sup> has shown good agreement with experiment. The theory emphasizes the viscous energy dissipation in the bulk and removes the singularities at the triple line by employing a microscopic slip boundary length,  $\delta$ , according to:

$$\theta_d = \left( \theta_e^3 + 9A \frac{\eta}{\gamma} v \right)^{1/3} \quad (\text{S1})$$

where  $A=\ln(R/\delta)$ ,  $\theta$  is expressed in radian and  $v$  in m/s. The effect of employing the DCA instead of the ECA in the LWE is tested in **Figure S2** for three different PEO homopolymers, by assuming  $v=dH/dt$ . Since  $\theta_e > \theta_d$ , the modified LWE invariably predicts a smaller capillary rise. Differences from the usual LWE are minor, hence DCAs, cannot account for the experimental observations in lower and higher molecular weight samples.

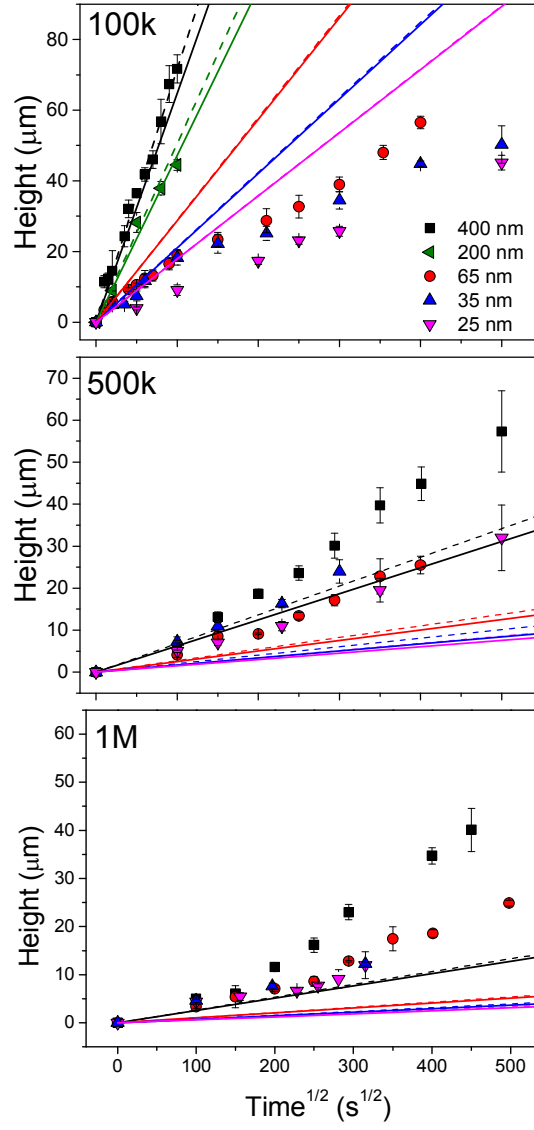

**Figure S2.** Imbibition length  $h$ , as a function of  $t^{1/2}$  for (top) **PEO 100k**, (middle) **PEO 500k** and (bottom) **PEO 1M** within self-ordered AAOs with different pore diameters; (squares) 400 nm, (left triangles): 200 nm, (spheres): 65 nm, (up triangles): 35 nm and (down triangles): 25 nm. Dashed and solid lines give the predictions of LWE (Eq. 9) and modified LWE equation (Eq. S1) for the dynamic contact angle.

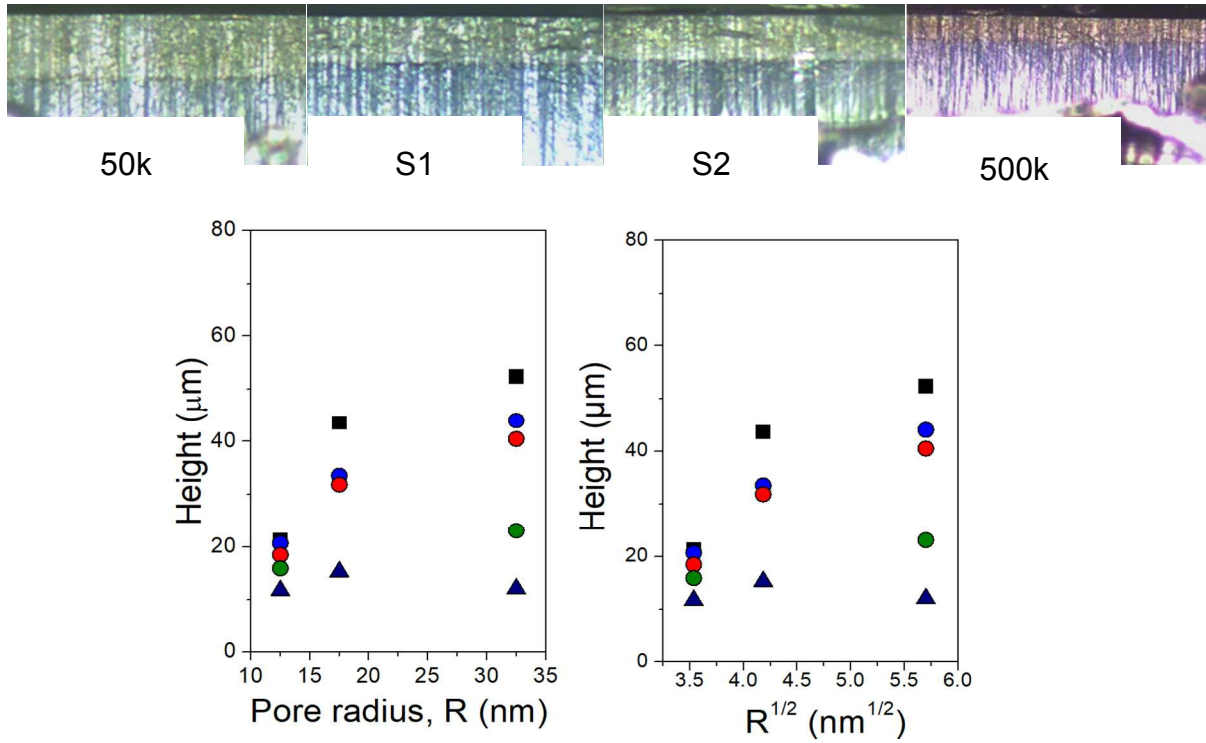

**Figure S3.** (Top) Reflection microscopy images of PEO 50 k, PEO 500 k and their blends (S1, S2) located inside 35 nm AAO pores obtained at the same imbibition time ( $t=200^{1/2} \text{ s}^{1/2}$ ). (Bottom) Comparison of imbibition lengths,  $h$ , as a function of pore diameter (left) and as a function of the square root of pore diameter (right) for the 50k (squares), 500k (triangles) and their mixtures with compositions: 50/50 (red spheres), 75/25 (blue spheres) and 25/75 (green spheres).

## References

1. R.L. Hoffman, "A study of the advancing interface. I. Interface shape in liquid-gas systems," J. Colloid Interface Sci., **50**, 228 (1975).
2. M.N. Popescu, J. Ralston, R. Sedev, "Capillary rise with velocity-dependent dynamic contact angle," Langmuir **24**, 12710 (2008).
3. M. Yang, B.-Y. Cao, W. Wang, H.-M. Yun, B.-M. Chen, "Experimental study on capillary filling in nanochannels," Chem. Phys. Lett. **662**, 137 (2016).
4. R.G. Cox, "The dynamics of the spreading of liquids on a solid surface. Part 1. Viscous flow ," J. Fluid Mech. **168**, 169 (1986).
